# Supplementary material for: Pack size, home range size and activity pattern of dhole (Cuon alpinus) in Mudumalai Tiger Reserve, India: effects of anthropogenic environment use and reproduction
Source: Research Square preprint supplement (doi:10.21203/rs.3.rs-6674422/v1), 2025-06-18
Supplement: Supplementary file 1 [file 44e095ed46abba5059598225.docx]

**Table 1** Research period and obtained data (a) between September 2011 and March 2014 and (b) between July 2014 and August 2015

### a

| Year | | 2011 | | | |  | 2013 | | | | | | |  | 2014 | | | Total |
| --- | --- | --- | --- | --- | --- | --- | --- | --- | --- | --- | --- | --- | --- | --- | --- | --- | --- | --- |
| Month | | 9 | 10 | 11 | 12 |  | 2 | 7 | 8 | 9 | 10 | 11 | 12 |  | 1 | 2 | 3 |  |
| Day | | 11–30 | 1–31 | 1–30 | 1–19 |  | 7–26 | 2–31 | 1–31 | 2–31 | 8–31 | 1–30 | 1–31 |  | 1–30 | 15–28 | 1–22 |  |
| Total study days | | 17 | 28 | 26 | 17 |  | 20 | 4 | 28 | 14 | 24 | 31 | 18 |  | 30 | 14 | 22 | 293 |
| Direct observation | No. of locations | 1 | 4 | 6 | 4 |  | 1 | 2 | 29 | 8 | 21 | 22 | 6 |  | 49 | 18 | 38 | 209 |
| Observation time (hrs) | 0.03 | 0.93 | 0.58 | 0.95 |  | 0.47 | 0.57 | 35.10 | 5.73 | 36.73 | 41.12 | 6.32 |  | 67.28 | 36.38 | 91.75 | 323.94 |
| No. of events | 1 | 4 | 6 | 4 |  | 1 | 2 | 29 | 8 | 21 | 22 | 6 |  | 49 | 18 | 38 | 209 |

### b

| Year | | 2014 | | | | |  | 2015 | | | | | Total |
| --- | --- | --- | --- | --- | --- | --- | --- | --- | --- | --- | --- | --- | --- |
| Month | | 7 | 8 | 10 | 11 | 12 |  | 1 | 2 | 3 | 7 | 8 |
| Day | | 24–31 | 1–3 | 30–31 | 25–30 | 1–31 |  | 1–31 | 1–28 | 1–25 | 22–31 | 1–30 |  |
| Total study days | | 8 | 3 | 2 | 6 | 31 |  | 31 | 28 | 25 | 10 | 30 | 174 |
| Sunrise time | | 6:05 | 6:10 | 6:13 | 6:20 | 6:35 |  | 6:50 | 6:45 | 6:30 | 6:05 | 6:10 | 6:30 |
| Sunset time | | 18:50 | 18:45 | 18:05 | 17:55 | 18:00 |  | 18:15 | 18:30 | 18:35 | 18:50 | 18:45 | 18:30 |
| Direct observation | No. of locations | 80 | 23 | 11 | 17 | 9 |  | 46 | 232 | 110 | 66 | 81 | 675 |
| Observation time (hrs) | 20.00 | 5.75 | 2.75 | 4.25 | 2.25 |  | 11.50 | 58.00 | 27.50 | 16.50 | 20.25 | 168.75 |
| No. of events | 9 | 3 | 11 | 12 | 6 |  | 20 | 28 | 18 | 9 | 17 | 133 |
| Video trapping | No. of locations | 6 | 4 | 1 | - | 7 |  | 15 | 15 | 12 | 13 | 14 | 87 |
| No. of traps | 10 | 7 | 2 | - | 12 |  | 22 | 18 | 14 | 14 | 15 | 114 |
| Trap-days | 30.7 | 7.1 | 0.6 | - | 131.3 |  | 332.8 | 357.9 | 188.9 | 97.6 | 373.2 | 1520.1 |
| No. of videos (identified packs) | 44 (43) | 20 (20) | 5  (5) | - | 37 (27) |  | 104 (93) | 72 (49) | 23 (21) | 37 (31) | 76 (52) | 418 (341) |
| No. of events (identified packs) | 18 (17) | 8  (8) | 1  (1) | - | 18 (11) |  | 64 (56) | 52 (36) | 11 (9) | 14 (10) | 41　(22) | 227 (170) |
| Camera trapping | No. of locations | - | - | - | 107 | 107 |  | 107 | 107 | 107 | - | - | 535 |
| No. of traps | - | - | - | 214 | 214 |  | 214 | 214 | 214 | - | - | 1070 |
| Trap-days | - | - | - | 606 | 3317 |  | 3317 | 2996 | 2648 | - | - | 12884 |
| No. of photos (identified packs) | - | - | - | 36  (8) | 293 (113) |  | 294 (15) | 167 (19) | 120 (13) | - | - | 910 (168) |
| No. of events (identified packs) | - | - | - | 11  (1) | 61 (10) |  | 61 (5) | 48 (2) | 33 (1) | - | - | 214 (19) |

**Table 2** Fundamental ecological information on the five identified packs of dholes during the camera trapping period

| Pack | Pack size | | | | |  | Home range size (km2)  (No. of points) | | | % of artificial environment in home range (human population) | No. of events  (observed days, No. of clips/images) | | | Study period |
| --- | --- | --- | --- | --- | --- | --- | --- | --- | --- | --- | --- | --- | --- | --- |
| Adult  ♂ | Adult  ♀ | Sex  unknown | Total adults  (identified adults) | No. of pups |  | All-year | Non-denning season | Denning  season | Direct  observation | Video  traps | Camera  traps |
| P1 | 2→1a | 1 | 6 | 9 (1)→8 (1) | 6→5b |  | 14.38  (254) | 14.11  (211) | 0.92  (43) | 17.8  (<500) | 37  (22) | 9  (8, 14) | 2  (2, 17) | Jan/2014–  Aug/2015 |
| P2 | 4→1a | 1 | 0 | 5 (5)→2 (2) | 8→6b |  | 6.97  (441) | 3.34  (134) | 4.02  (307) | 30.4  (<5,000) | 53  (37) | 95  (52, 182) | 0  (0) | Oct/2011–  Mar/2015 |
| P3 | 3 | 1 | 4 | 8 (1) | 0 |  | 36.14  (31) | NA | NA | 0.6  (<500) | 1  (1) | 23  (15, 65) | 7  (7, 64) | Jan–Aug/2015 |
| P4 | 1 | 1 | 6 | 8 (1) | 0 |  | 40.29  (80) | NA | NA | 0.0  (0) | 4  (4) | 43  (30, 79) | 10  (10, 87) | Feb/2013  Jan–Aug/2015 |
| P5 | 1 | 1 | 9 | 11 (0) | 0 |  | NA | NA | NA | NA | 4  (4) | 0  (0) | 0  (0) | Aug/2015 |

aSome adults of P1 and P2 died for unknown reasons on 24th December, 2014 and 25th July, 2015 respectively

bSome pups of P1 and P2 disappeared by 19th and 9th February, 2015 respectively

**Table 3** Mean number of adults in group observed during denning and non-denning seasons

|  | Mean no. of adults in group (min–max) | | *U* | *P* |
| --- | --- | --- | --- | --- |
| Denning  (Dec–Feb) | Pre/Post-denning (Mar–Nov) |
| Local population (N=327) | 4.5±2.3 (1–12)  (N=123) | 6.3±3.0*** (1–16)  (N=204) | 7891.0 | <0.001 |
| P1  (N=47) | 5.4±3.5 (1–12)  (N=10) | 7.8±3.3 (1–16)   (N=37) | 118.5 | 0.083 |
| P2  (N=227) | 4.4±2.1 (1–9)  (N=105) | 6.1±2.6*** (1–9)  (N=122) | 3844.0 | <0.001 |
| Other than P1/P2 (N=53) | 4.6±2.1 (2–9) (N=8) | 6.2±3.2 (1–12)  (N=45) | 150.0 | 0.462 |

***p<0.001

**Table 4** The number of observed events and recorded sites and the average distance between recorded sites in the daytime and nighttime during 2014–2015

| All year | % of events (N) | |  |  |  |  | % of recorded sites (N) | |  |  |  |  | Average distance between recorded sites (± SD km) (N) | |  |  |
| --- | --- | --- | --- | --- | --- | --- | --- | --- | --- | --- | --- | --- | --- | --- | --- | --- |
| Day | Night | *χ*2 | df | *P* |  | Day | Night | *χ*2 | df | *P* |  | Day | Night | *U* | P |
| Local population | 74.4*** (328) | 25.6 (113) | 104.8 | 1 | <0.001 |  | 77.9*** (95) | 22.1  (27) | 37.9 | 1 | <0.001 |  | NA | NA | NA | NA |
| P1 | 81.8*  (9) | 18.2  (2) | 4.5 | 1 | 0.035 |  | 75.0  (6) | 25.0  (2) | NA | NA | NA |  | 2.32±1.78  (36) | 1.50  (1) | NA | NA |
| P2 | 49.5  (47) | 50.5  (48) | 0.0 | 1 | 0.918 |  | 63.2  (12) | 36.8  (7) | 1.3 | 1 | 0.251 |  | 2.20±1.83***  (1081) | 0.53±0.73  (1128) | 853926.0 | <0.001 |
| P3 | 76.7**  (23) | 23.3  (7) | 8.5 | 1 | 0.003 |  | 77.8* (14) | 22.2  (4) | 5.6 | 1 | 0.018 |  | 3.34±2.30***  (253) | 0.81±1.01  (21) | 4345.0 | <0.001 |
| P4 | 92.5***  (49) | 7.5  (4) | 38.2 | 1 | <0.001 |  | 82.6** (19) | 17.4  (4) | 9.8 | 1 | 0.002 |  | 2.57±2.22  (1176) | 1.56±0.91  (6) | NA | NA |

df, degrees of freedom; NA, not applicable

***p<0.001, **p<0.01, *p<0.05

**Table 5** Observed behaviours of dholes in Mudumalai Tiger Reserve

| Category | Behaviour | Definition | N | |
| --- | --- | --- | --- | --- |
| Direct observation  (mean ± SD and min to max no. of observed individuals) | Video traps |
| Resting | Stand still | Stand still with four legs | 517  (5.3±1.8, 1–9) | 31 |
| Sit | Sit on the ground | 10 |
| Lie down | Lay oneself down on the ground | 39 |
| Locomotion | Locomote | Walk or trot some distance | 77  (4.1±1.8, 1–8) | 155 |
| Feeding | Feed | Eat something | 5  (6.5±3.9, 1–11) | 3 |
| Excretion- associated | Sniff scats/urine | Keep one’s nose within 5 cm to a scat/urine for at least two seconds | 11  (5.0±1.7, 2–8) | 84 |
| Excrete | Defecate or urinate (unidentified) | 7 |
| Defecate | Excrete scats | 39 |
| Urinate | Excrete urine | 34 |
| Marking urination | Male's raised-leg (RLU) and female's handstand urination on objects | 6 |
| Social | Social contact | Touch another individual with one's body part | 24  (5.5±1.7, 5–8) | 24 |
| Allo-groom | Groom another individual | 4 |
| Vocalise | Produce a call | 22 |
| Play | Wrestle or chase each other | 6 |
| Food-beg | Submissive individual's greeting towards dominant one | 5 |
| Others | Self-groom | Groom oneself | 3  (5.0, 5–9) | 4 |
| Drink | Drink water | 7 |
| Bathe | Soak it's body in water | 3 |

Licking urine (N=1) was excluded for this analysis

**Table 6** Observation records of dhole related to hunting and feeding recorded in the direct observation (2011–2015)

| Pack name | Date | Time | Behaviour | location in Fig 3 |
| --- | --- | --- | --- | --- |
| P1 | 03 Mar 2015 | 18:01 | Chase a wild boar | - |
| P2 | 13 Aug 2013 | 06:39 | Eat a sambar deer | - |
| P2 | 14 Aug 2013 | 06:16 | Eat a sambar deer | - |
| P2 | 13 Oct 2013 | 06:07 | Eat a garbage at a waste site | a |
| P2 | 29 Oct 2013 | 17:27 | Eat something at a waste site | a |
| P2 | 09 Nov 2013 | 06:08 | Chase a wild boar | － |
| P2 | 19 Nov 2013 | 09:03 | Chase a sambar deer fawn | - |
| P2 | 22 Nov 2013 | 17:31 | Chase a Indian wild hare | － |
| P2 | 23 Nov 2013 | 17:58 | Eat a garbage at a waste site | a |
| P2 | 27 Nov 2013 | 10:39 | Chase a Indian wild hare | - |
| P2 | 13 Jan 2014 | 09:14 | Attack a cattle calf | b |
| P2 | 21 Mar 2014 | 14:56 | Eat a goat’s carcass | d |
| P2 | 30 Oct 2014 | 16:47 | Scavenge a leopard’s kill (Spotted deer) | - |
| P2 | 02 Nov 2014 | 08:56 | Eat a spotted deer | - |
| P2 | 07 Feb 2015 | 17:51 | Eat a piece of goat meat | - |
| P2 | 08 Mar 2015 | 17:30 | Scavenge a tiger’s/leopard’s kill (Spotted deer) | - |
| P4? | 13 Feb 2013 | 10:24 | Eat a spotted deer | - |
| P4 | 25 Aug 2015 | 09:13 | Chase a wild boar | - |
| P5 | 26 Aug 2015 | 08:22 | Eat a spotted deer | - |
| P2 | 16 Jan 2014 | - | Chiken’s feathers found in front of a den | c |
| P2 | 07 Mar 2015 | - | Cattle calf’s carcass | e |
| Unknown | 12 Jul 2015 | - | Spotted deer’s carcass | - |
| Unknown | 10 Aug 2015 | - | Spotted deer’s carcass | - |
