# Supplementary material for: Pack size, home range size and activity pattern of dhole (Cuon alpinus) in Mudumalai Tiger Reserve, India: effects of anthropogenic environment use and reproduction
Source: Research Square preprint supplement (doi:10.21203/rs.3.rs-6674422/v1), 2025-06-18
Supplement: Supplementary file 2 [file 7ef4ce01a8e2ffe8869deccd.docx]

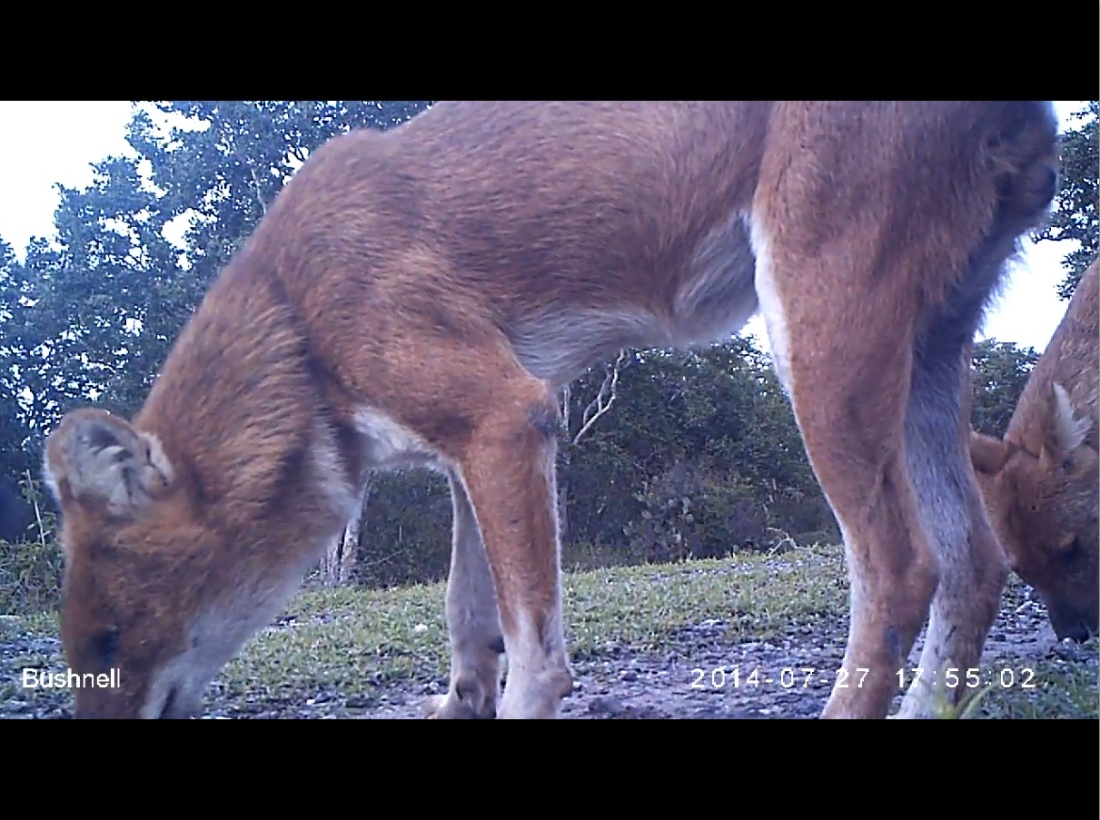


1. Identified member of Pack 1 (D1♂) with much white fur and the white left forefoot.


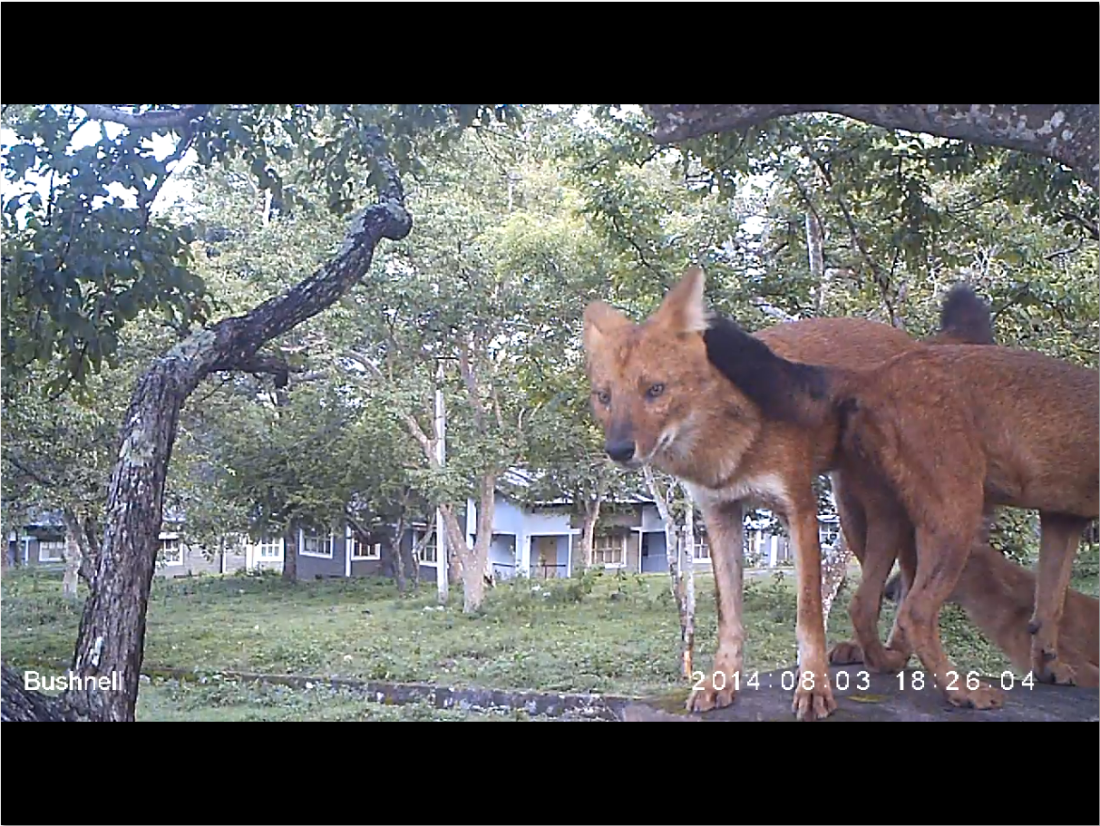


1. Identified member of Pack 2 (D2♂) with much white fur and a smiley face.


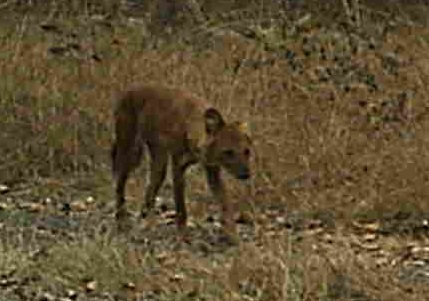


1. Identified member of Pack 3 (D3♂) lacking the upper part of its left ear.


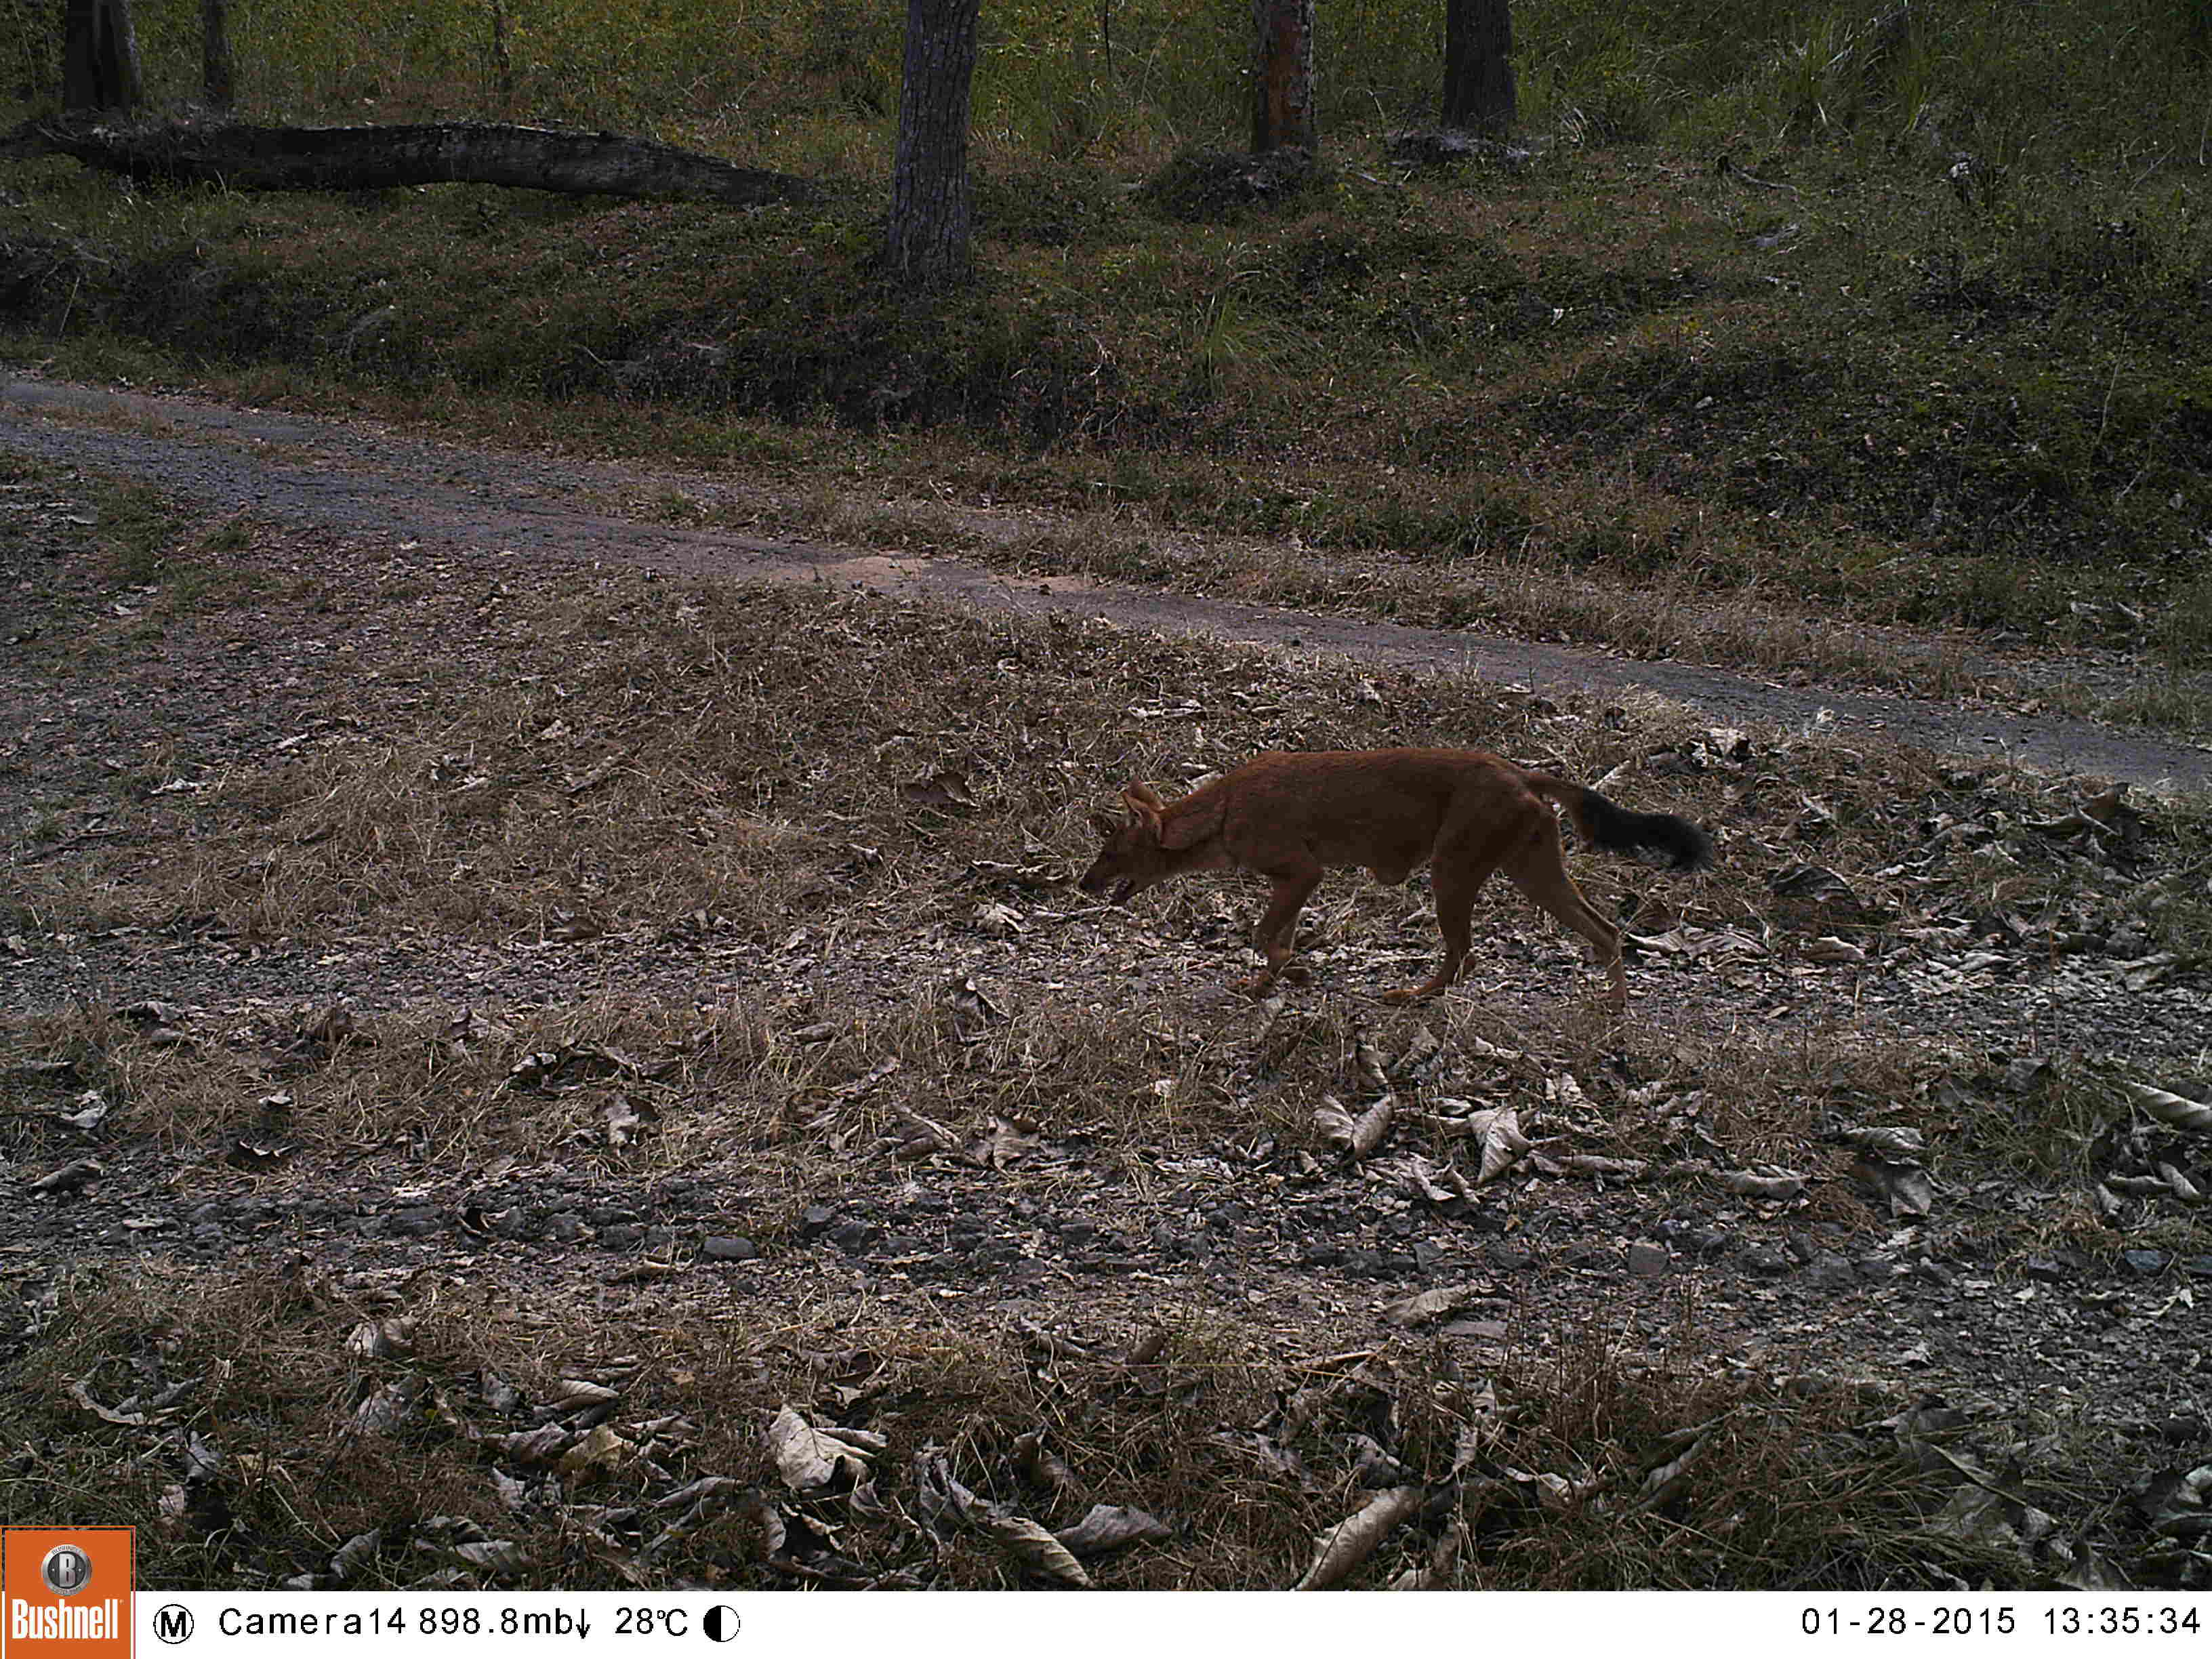


1. Identified member of Pack 4 (D4♂) with a tumour on its abdomen.

**SI1.** Photo identification of pack members of the study

**SI2.** Relationship between the estimated home range sizes (MCP) and cumulative observation days for each pack

**SI3.** List of Human-dhole interactions (human to dhole only)

| Pack name | Date | Time | Behaviour of humans |
| --- | --- | --- | --- |
| P2 | 2013/8/7 | 6:10 | Chase dholes away |
| P2 | 2013/8/13 | 7:09 | Throw stones towards dholes |
| P2 | 2013/8/14 | 7:43 | Disturb dholes by crossing nearby |
| P2 | 2013/8/18 | 7:10 | Throw stones towards dholes |
| P2 | 2013/8/22 | 8:01 | Disturb dholes by crossing nearby |
| P2 | 2013/10/9 | 7:08 | Throw stones towards dholes |
| P2 | 2013/10/22 | 12:?? | Disturb dholes by crossing nearby |
| P2 | 2014/1/12 | 16:50 | Disturb dholes by crossing nearby |
| P2 | 2014/1/13 | 15:47-17:16 | Disturb dholes by crossing nearby |
| P2 | 2014/1/18 | 16:34 | Chase dholes away |
| P2 | 2014/1/18 | 16:57 | Chase dholes away |
| P2 | 2014/3/7 | 18:16 | Chase dholes away |
| P2 | 2014/3/10 | 16:27 | Chase dholes away |
| P2 | 2014/3/21 | 17:?? | Chase dholes away |
| P2 | 2014/10/30 | 8:58 | Chase dholes away |
